# Supplementary material
Source: PubMed Central journal article supplement (PMC2151726)
Supplement: plntphys_pp.107.107391_1.pdf [file plntphys_pp.107.107391_1.pdf]

Supplemental Figure 1  
Dong et al.

```
NbMADS4-1      MGRGRVELKRIENKINRQVTFAKRRNGLLKKAYELSVLCDAEVALIIFSNRGKLYEFCST
NbMADS4-2      MGRGRVELKRIENKINRQVTFAKRRNGLLKKAYELSVLCDAEVALIIFSSRGKLYEFCST
NtMADS4        MGRGRVELKRIENKINRQVTFAKRRNGLLKKAYELSVLCDAEVALIIFSSRGKLYEFCST
SlMADS1        MGRGRVELKRIENKINRQVTFAKRRNGLLKKAYELSVLCDAEVALIIFSNRGKLYEFCST
                *****

NbMADS4-1      SSMMKTIEKYQHCSYASSLASQSVTD-TQNNYHEYLRRLKARVELLQRSQRNLLGEDLGTL
NbMADS4-2      SSMMQTSCLKYQCCSYASLDPMQASDHTRNNYHEYLRRLKARVELLQRSQRNLLGEDLGTL
NtMADS4        SSMMQTSCLKYQCCSYASLDPMQASDHTQNNYHEYLRRLKARVELLQRSQRNLLGEDLGTL
SlMADS1        SSMVKTIEKYQRCSYATSLANQSVTD-TQNNYHEYLRRLKARVELLQRSQRNLLGEDLGTL
                ***..*.***.***.*.  ** .* *.*****

NbMADS4-1      STKDSLQSLNQSLSLQKIRSRKTQFMLDQLAELQREQMLAESNHLRRKSLESAAAGIP
NbMADS4-2      NSKESLHSLHQLDSSLKQIRSRKTQNMQLDLADLQKEQMLAEANKQLRRKSLESAAARVP
NtMADS4        NSGESLHSLHQLDSSLKQIRSRKTQNMQLDLADLQKEQMLAEANKQLRRKSLESAAARVP
SlMADS1        SSKDSLQSLNQSLSLQKIRSRKTQFMLDQLADLQKEQMLAESNRLRRKSLESVAGFP
                . .*.***..*.***** *****.***.***.*. ***** * *

NbMADS4-1      LRLCWEDG---TQAMQVNRLPQTEGFFQPLGLTSS-PQFGYN-HVGTDEVNGGASAHNMN
NbMADS4-2      LRLSWDNGG-QTMQHNRQLPPQTEGFFQPLGLNSS-PQFGYSTPMGGNEVNAAATANNMN
NtMADS4        LRLSWDNGG-QTMQHNRQLPPQTEGFFQPLGLNSS-PQFGYS-PMGGNEVNAAATANNMN
SlMADS1        LRLCWEDGGDQLMHQQRNRLPNTTEGFFQPLGLHSSSPHFGYN-PVNTDEVNAAATAHNMN
                ***.*. * . . *.***** ** *.*. * . . *** *.***

NbMADS4-1      GFIPGWML
NbMADS4-2      GFIPGWML
NtMADS4        GFIPGWML
SlMADS1        GFIPGWML
                *** ****
```



Supplemental Figure 3  
Dong et al.

```
NbMADS4-1F1      --GGGAAGAGGAAGAGTTGAACTAAAGAGAATAGAGAACAAAATAAACAGGCAAGTTACT
NbMADS4-2F1      ATGGGAAGAGGAAGAGTTGAACTAAAGAGGATAGAGAACAAAATAAACAGGCAAGTTACT
                  *****
NbMADS4-1F1      TTTGCTAAGAGAAGAAATGGACTTCTCAAGAAAGCCTATGAACTTTCTGTTCTCTGCGAT
NbMADS4-2F1      TTTGCAAAGAGAAGAAATGGACTTCTCAAAAAGCTTATGAACTTTCAGTTTATGTGAT
                  *****
NbMADS4-1F1      GCTGAGGTTGCTCTTATCATCTTCTCTAATCGTGGTAACTATATGAGTTCTGCAGTACT
NbMADS4-2F1      GCTGAAGTTGCTCTTATCATCTTCTCTAGCCGTGGCAAACCTATGAATTTGCAGCACT
                  *****
NbMADS4-1F1      TCAAGCATGATGAAAACAATTGAAAAATATCAACATTGTAGCTATGCTTCTTGGGAAGCC
NbMADS4-2F1      TCTAGCATGATGCAAACACTTGAAAAGTATCAACAATGCAGCTACGCCTTTGGACCCA
                  *****
NbMADS4-1F1      AGCCAATCAGTFACTGAT---ACTCAGAACAAC TACCACGAGTATTTGAGGCTAAAAGCT
NbMADS4-2F1      ATGCAATCAGCTAGCGATCATACTCGGAACAATTACCATGAGTATCTGAGGCTAAAAGCT
                  *
NbMADS4-1F1      AGAGTCGAGCTCCTACAGCGATCTCAGAGAAACCTTCTTGGGGAAGATTTGGGGACATTA
NbMADS4-2F1      AGAGTTGAGCTTCTTCAACGATCTCAGAGAAATCTTCTTGGGAGGACTTGGGCACAC--
                  *****
NbMADS4-1F1      AGTACCAAGGACCTCGAGCAGCTTGAGAATCAATTAGAGGCGTCTTAAAGCAAATCAGG
NbMADS4-2F1      -----

NbMADS4-1F1      TCAAGGAAG
NbMADS4-2F1      -----
```



**Supplemental Table1.** Primers used to generate *N. benthamiana* cDNA fragments by RT-PCR for VIGS.

| Gene                                           | Strand | Primer sequences                             |
|------------------------------------------------|--------|----------------------------------------------|
| <i>MAP3K</i>                                   | F      | CGACGACAAGACCCTGGAGGGGCAGCTTCTACTGATG        |
|                                                | R      | GAGGAGAAGAGCCCTCCATTTCCGCAGCTTGCTCCTG        |
| <i>Agamous-like</i>                            | F      | CGACGACAAGACCCTCTGTGCTCTGTGATGCTGAGGTTG      |
|                                                | R      | GAGGAGAAGAGCCCTCGAGTATCAAATTGATGAGGTGGAGGC   |
| <i>NbMADS4</i>                                 | F      | CGACGACAAGACCCTGGGAAGAGGAAGAGTTGAACTTAAG     |
|                                                | R      | GAGGAGAAGAGCCCTCTTCCTTGACCTGATTTGCTTCAAGG    |
| <i>Ribosomal protein L11-like</i>              | F      | CGACGACAAGACCCTGCTCGTTCTCAACATCTCTGTCCG      |
|                                                | R      | GAGGAGAAGAGCCCTGGTATCCTGGGCGTTCTAGGACAAC     |
| <i>Phosphatase 2A</i>                          | F      | CGACGACAAGACCCTCCAGCTATTGTTGAGCTGGCAGAG      |
|                                                | R      | GAGGAGAAGAGCCCTGCGAACATCAACATCAGGGTCTTC      |
| <i>Alpha-tubulin</i>                           | F      | CGACGACAAGACCCTGAGAGTGCATTTCAATCCACATTGGCCAG |
|                                                | R      | GAGGAGAAGAGCCCTGTGATCCAAGGCCAGAACCAGTGCC     |
| <i>Phloem transcription factor M1</i>          | F      | CGACGACAAGACCCTCTGGTCAGAGACAGGGGCAGCCTG      |
|                                                | R      | GAGGAGAAGAGCCCTCCTGTGATTGTTGCAACGGAATC       |
| <i>RuBisCO small subunit 3A/3C</i>             | F      | CGACGACAAGACCCTGCTAACATGGTTGCACCTTCTACTG     |
|                                                | R      | GAGGAGAAGAGCCCTCTTCGCCTCTTCTACCTCAGCC        |
| <i>Cyclin-dependent protein kinase p34cdc2</i> | F      | CGACGACAAGACCCTGGTGAAGGAACGTACGGCGTAGTG      |
|                                                | R      | GAGGAGAAGAGCCCTGAGTAGTGGCGTGATCCTAGCAG       |
| <i>Expressed protein</i>                       | F      | CGACGACAAGACCCTGCTGTCAGTGGAGAACTTGAG         |
|                                                | R      | GAGGAGAAGAGCCCTGCCTGGAGGCGCTTCCCTAGTTG       |
| <i>HSP70</i>                                   | F      | CGACGACAAGACCCTGGCGATCGGAATCGATCTCGGAAC      |
|                                                | R      | GAGGAGAAGAGCCCTCTGTTCTCAATCTTCTAAGGGCTC      |
| <i>Geranylgeranyl reductase</i>                | F      | CGACGACAAGACCCTCACCGCCTCCGTCAATCCTCGCC       |
|                                                | R      | GAGGAGAAGAGCCCTGCGACACGGGAATTTGCACCGTC       |
| <i>Polyubiquitin</i>                           | F      | CGACGACAAGACCCTGAAGGAATCCCACCGGACCAGC        |
|                                                | R      | GAGGAGAAGAGCCCTGCTAGGGTTCGGCCATCTTCCAAC      |
| <i>Plastidic aldolase NPALDP1</i>              | F      | CGACGACAAGACCCTCTCGCTATGCTGCAATTTCTCAGGAC    |
|                                                | R      | GAGGAGAAGAGCCCTAACATTCCCTTCTTGGCCTCCTCAG     |

**Supplemental Table 2.** Primers for semi-quantitative RT-PCR.

| Gene                                           | Strand | Primer sequences                            |
|------------------------------------------------|--------|---------------------------------------------|
| <i>MAP3K</i>                                   | F      | GCAGAGGTTTCTGGACGTGGAAGG                    |
|                                                | R      | CAAGCCCACCATGAGCGCGAAGCTG                   |
| <i>Agamous-like</i>                            | F      | CTCTCCACAAAGGAAACTGGGAAGAG                  |
|                                                | R      | GACTAGTTGAAGAGATGGTTGGTC                    |
| <i>NbMADS4</i>                                 | F      | CGACGACAAGACCCTGAAGATTTGGGGACATTAAGTAC      |
|                                                | R      | GAGGAGAAGAGCCCTCACCCATGGGACTATATCCAAATTGAGG |
| <i>Ribosomal protein L11-like</i>              | F      | CCGATGAGGGAGATTAAGTCCAG                     |
|                                                | R      | CACCTTCATATTTGACCTGGAACCAC                  |
| <i>Phosphatase 2A</i>                          | F      | CGACTATTGCACGTGCCCTTGGTGAG                  |
|                                                | R      | CTAGTGGGCTCAGGCCCTACAGCTTCAC                |
| <i>Alpha-tubulin</i>                           | F      | CAGGCGCTCACTGGACATTGAGC                     |
|                                                | R      | CTTCAGCACCAACCTCCTCATAATCC                  |
| <i>Phloem transcription factor M1</i>          | F      | CAGCGAACATGCCTCTATCTCAACAG                  |
|                                                | R      | GCTGCTGCATTTGCGGAATCTGCTG                   |
| <i>RuBisCO small subunit 3A/3C</i>             | F      | GGCTTCCTCAGTTCTTTCCTCTGC                    |
|                                                | R      | GTAGCCTTCTGGCTTGTAGGCGATG                   |
| <i>Cyclin-dependent protein kinase p34cdc2</i> | F      | GTGAGGTTGCAGGATGTTGTGCACAG                  |
|                                                | R      | CTGGCAGTGATTCTCTTGCTGGGATC                  |
| <i>Expressed protein</i>                       | F      | CCTAAACTGGACGTCCGCTCACTG                    |
|                                                | R      | GGAGTAGACTGTAAAAGCACCCGGAG                  |
| <i>HSP70</i>                                   | F      | CGTGCCAGATTTGAGGAGTTGAAC                    |
|                                                | R      | CTGTGATCTGTGGCACACCCCTAGGTG                 |
| <i>Geranylgeranyl reductase</i>                | F      | CGGTGACTACGAGTACGCTATTGC                    |
|                                                | R      | GTACGTTGGCCAATAAGTCTTGTCC                   |
| <i>Polyubiquitin</i>                           | F      | GACCATAACCCTTGAGGTTGAAAGCTCC                |
|                                                | R      | CTCTGCTGGTCCGGTGGGAATACCTTC                 |
| <i>Plastidic aldolase NPALDP1</i>              | F      | CAGCATCTCTCCTCAAGACATCAC                    |
|                                                | R      | CGAGGCAAGCCATCAAGACCTTGG                    |

### Supplementary Table 3. List of tomato ESTs cloned into TRV-LIC vector

SGN=Solanaceae Genome Network; <http://www.sgn.cornell.edu/>

TIGR=The Institute for Genomic Research; <http://www.tigr.org/>

| SGN ID      | TIGR ID         | Annotation                                                  |
|-------------|-----------------|-------------------------------------------------------------|
| SGN-U215591 | TC117284        | adenylate kinase                                            |
| SGN-U215524 | TC117120        | Avr9/Cf-9 rapidly elicited protein 216; similar to AtCIPK11 |
| SGN-U219948 | TC119729        | calcium-dependent protein kinase                            |
| SGN-U253789 | TC129944        | calcium-dependent protein kinase, putative                  |
| SGN-U215111 | TC117613/128413 | casein kinase -related                                      |
| SGN-U237058 | TC117686        | casein kinase -related                                      |
| SGN-U216818 | TC122424        | CDK-activating kinase                                       |
| SGN-U218632 | TC118413        | cell division protein kinase, putative                      |
| SGN-U215180 | TC125828        | cyclin-dependent protein kinase p34cdc2                     |
| SGN-U213290 | TC115894        | guanylate kinase                                            |
| SGN-U227901 |                 | hexokinase - like protein                                   |
| SGN-U214512 | TC116753        | histidine kinase -related                                   |
| SGN-U224568 | TC130115        | kinase family                                               |
| SGN-U230347 |                 | lectin-like protein kinase                                  |
| SGN-U221811 | TC128145        | MAP3K epsilon protein kinase                                |
| SGN-U227773 | TC122065        | MAP3K-like protein kinase                                   |
| SGN-U216183 | TC125769        | mitogen-activated protein kinase                            |
| SGN-U219275 | TC117642        | mitogen-activated protein kinase                            |
| SGN-U222587 | TC127497        | mitogen-activated protein kinase                            |
| SGN-U215877 | TC117232        | mitogen-activated protein kinase 3 [Lycopersicon]           |
| SGN-U216124 | TC125944/128977 | probable serine/threonine-specific protein kinase           |
| SGN-U227044 | TC128546        | Protein kinase                                              |
| SGN-U215442 | TC126113        | protein kinase - related                                    |
| SGN-U216895 | TC118017        | protein kinase family                                       |
| SGN-U222547 | TC120359        | protein kinase family                                       |
| SGN-U222742 | TC120530        | protein kinase family                                       |
| SGN-U236987 | AI897667        | protein kinase family                                       |
| SGN-U215376 | TC117597        | protein kinase family                                       |
| SGN-U221687 | TC118839        | protein kinase family                                       |
| SGN-U217316 | TC127126        | protein kinase family                                       |

| <b>SGN ID</b> | <b>TIGR ID</b>  | <b>Annotation</b>                                       |
|---------------|-----------------|---------------------------------------------------------|
| SGN-U218092   | TC126439        | protein kinase putative                                 |
| SGN-U222019   | TC128481        | protein kinase, putative                                |
| SGN-U212907   | TC127333        | protein kinase-like                                     |
| SGN-U224686   | TC128618        | protein kinase-like                                     |
| SGN-U216039   | TC119561/130626 | protein kinase-like                                     |
| SGN-U223335   | TC122315        | protein kinase-related                                  |
| SGN-U219959   | TC119066        | putative choline kinase                                 |
| SGN-U223517   | TC129136        | putative leucine rich repeat containing protein kinase  |
| SGN-U214229   | TC117937/118317 | putative protein kinase                                 |
| SGN-U215637   | TC125399        | putative protein kinase                                 |
| SGN-U223027   | TC120306        | putative protein kinase                                 |
| SGN-U218650   | TC129215        | putative receptor protein kinase                        |
| SGN-U219091   | AW035166        | putative receptor ser/thr protein kinase                |
| SGN-U230845   | TC130439        | putative receptor-like kinase                           |
| SGN-U213787   | TC117285        | putative receptor-like serine-threonine protein kinase  |
| SGN-U219487   | TC118370        | putative serine/threonine kinase                        |
| SGN-U220166   | TC127203        | pyruvate kinase, putative                               |
| SGN-U230817   |                 | Pyruvate,phosphate dikinase, chloroplast precursor      |
| SGN-U221648   | TC122980        | receptor kinase -related                                |
| SGN-U215435   | TC117205        | receptor protein kinase-like                            |
| SGN-U221567   | TC120194        | receptor protein kinase-like                            |
| SGN-U219921   | TC119198        | receptor-like kinase                                    |
| SGN-U218475   | TC117777        | receptor-like protein kinase                            |
| SGN-U219031   | TC127343        | receptor-like protein kinase                            |
| SGN-U217267   | TC117825        | receptor-like protein kinase                            |
| SGN-U226221   | AI486932        | receptor-like protein kinase                            |
| SGN-U213789   | TC125303        | receptor-like serine-threonine protein kinase           |
| SGN-U230206   | AW930866        | receptor-related protein kinase                         |
| SGN-U213441   | TC118172/129395 | serine/threonine protein kinase                         |
| SGN-U216277   | TC122634/125534 | serine/threonine protein kinase, NPH 1-like             |
| SGN-U226750   | TC131008        | serine/threonine/tyrosine kinase                        |
| SGN-U216101   | TC125905/126860 | Shaggy-like kinase                                      |
| SGN-U213450   | TC116248        | shaggy-related protein kinase alpha                     |
| SGN-U216573   | TC125552        | shikimate kinase family                                 |
| SGN-U222627   | TC119157        | similar to Arabidopsis CBL-interacting protein kinase 8 |



| <b>SGN ID</b> | <b>TIGR ID</b>  | <b>Annotation</b>                                   |
|---------------|-----------------|-----------------------------------------------------|
| SGN-U224768   | TC122804        | wee1-like CDK tyrosine kinase                       |
| SGN-U231230   | TC130936        | cytokinin receptor CRE1a                            |
| SGN-U227032   |                 | pyrophosphate-dependent phosphofructo-1-kinase      |
| SGN-U212887   | TC123856        | ribose phosphate pyrophosphokinase -related         |
| SGN-U215788   | TC125240        | ribose-phosphate pyrophosphokinase 2                |
| SGN-U213890   | TC125928        | phosphoenolpyruvate carboxylase kinase              |
| SGN-U226571   | AW650614        | hydroxyethylthiazole kinase -related                |
| SGN-U214118   | TC126027/126679 | protein phosphatase                                 |
| SGN-U225194   | TC126484        | protein phosphatase                                 |
| SGN-U217392   | TC119223        | protein phosphatase 2A B'kappa subunit [            |
| SGN-U214825   | TC124599/130329 | protein phosphatase 2A catalytic subunit            |
| SGN-U215467   | TC119627        | protein phosphatase 2A regulatory subunit B-related |
| SGN-U247460   | AI771367        | protein phosphatase 2AB regulatory subunit-like     |
| SGN-U226314   | TC118222        | protein phosphatase 2C                              |
| SGN-U225548   | TC123716        | protein phosphatase 2C (PP2C), putative             |
| SGN-U238504   | TC121915        | protein phosphatase 2C (PP2C), putative             |
| SGN-U221533   | TC128991        | protein phosphatase 2C (PP2C), putative             |
| SGN-U222730   | TC128133        | protein phosphatase 2C homolog                      |
| SGN-U221904   | TC119829/119830 | protein phosphatase 2C -related                     |
| SGN-U212680   | TC124499/124501 | protein tyrosine phosphatase                        |
| SGN-U225991   | TC123367        | acid phosphatase-related protein                    |
| SGN-U231334   | TC168083        | dual specificity protein phosphatase family protein |
| SGN-U231700   | BF113002        | kinase associated protein phosphatase               |
| SGN-U216137   | TC117670        | MAP kinase phosphatase                              |
| SGN-U219796   | TC159340        | phosphatase 2C family protein                       |
| SGN-U215815   | TC121642        | phosphatidic acid phosphatase (PAP2) family         |
| SGN-U215813   | TC119839        | phosphatidic acid phosphatase alpha                 |
| SGN-U222920   | TC130180        | phosphoinositide phosphatase family protein         |
| SGN-U217400   | TC126828        | probable inorganic diphosphatase                    |
| SGN-U215067   | TC124735        | probable inositol-1,4,5-trisphosphate 5-phosphatase |
| SGN-U215019   | TC116990        | putative acid phosphatase                           |
| SGN-U215885   | TC130575        | putative inositol polyphosphate 5-phosphatase       |
| SGN-U223124   | TC120352        | putative protein phosphatase-2C                     |
| SGN-U214209   | TC125061        | Ser/Thr specific protein phosphatase 2A             |
| SGN-U213418   | TC124217/124218 | serine/threonine protein phosphatase 2A             |

| <b>SGN ID</b> | <b>TIGR ID</b>         | <b>Annotation</b>                                     |
|---------------|------------------------|-------------------------------------------------------|
| SGN-U218431   | TC117638               | type 5 protein serine/threonine phosphatase           |
| SGN-U234495   | TC126857               | putative inorganic pyrophosphatase                    |
| SGN-U213604   | TC116459/116460        | inorganic pyrophosphatase                             |
| SGN-U213462   | TC116345/126721        | inorganic pyrophosphatase - like protein              |
| SGN-U219020   | TC120802               | AP2 domain transcription factor, putative             |
|               | AW032093               | AtbZIP transcription factor                           |
| SGN-U216842   | TC117426               | AT-hook DNA-binding protein, putative                 |
| SGN-U214345   | TC124798               | bZIP DNA-binding protein HBF-1                        |
| SGN-U220052   | TC128363               | bZIP family transcription factor                      |
| SGN-U220290   | TC129045               | bZIP family transcription factor                      |
| SGN-U215425   | TC125280               | bZIP family transcription factor                      |
| SGN-U222417   | TC127481               | bZIP family transcription factor (TGA1)               |
| SGN-U214344   | TC124797               | bZIP transcription factor                             |
| SGN-U227506   | AW032093               | bZIP transcription factor                             |
| SGN-U217064   | TC126049               | CCAAT-box binding transcription factor subunit B      |
| SGN-U220073   | TC128155               | c-myc binding protein -related                        |
| SGN-U220234   | TC119295               | GATA transcription factor                             |
| SGN-U216318   | TC116102               | GATA zinc finger protein                              |
| SGN-U218025   | TC118250/131152        | GATA-type zinc finger protein                         |
| SGN-U218523   | TC129513/129874        | heat shock factor protein, putative (HSF6)            |
| SGN-U225155   | TC131560               | heat shock transcription factor family                |
| SGN-U224034   |                        | homeobox-leucine zipper protein                       |
| SGN-U221990   |                        | homeobox-leucine zipper protein ATHB-7 like           |
| SGN-U213729   | TC124451               | homeodomain protein                                   |
| SGN-U213417   | TC124192               | homeotic protein VAHOX1 - tomato homeobox             |
| SGN-U217280   | TC118590               | MADS box protein                                      |
| SGN-U215919   | TC117238               | MADS box protein TDR6                                 |
| SGN-U220567   | TC118874               | MADS-box JOINTLESS protein                            |
| SGN-U215918   | TC117238               | MADs-box protein                                      |
| SGN-U216564   | TC116540/125359/125360 | MADS-box protein 1 [ <i>Lycopersicon esculentum</i> ] |
| SGN-U217082   | AI486089               | MADS-box transcription factor                         |
| SGN-U215971   | TC118308               | myb-related protein                                   |
| SGN-U233378   |                        | myb-related protein                                   |
| SGN-U217803   | TC120027               | myb-related transcription factor                      |
| SGN-U217873   | TC119661               | myb-related transcription factor                      |

| <b>SGN ID</b> | <b>TIGR ID</b>  | <b>Annotation</b>                                      |
|---------------|-----------------|--------------------------------------------------------|
| SGN-U217437   | TC118608        | myb-related transcription factor LBM1                  |
| SGN-U217157   | TC130887        | PHAVOLUTA-like HD-ZIPIII protein                       |
| SGN-U217966   | TC122820        | probable MADS box transcription factor                 |
| SGN-U223167   | TC128630        | squamosa-promoter binding protein -related             |
| SGN-U229667   |                 | TCP family transcription factor, putative              |
| SGN-U213659   | TC125305/126125 | TDR4 transcription factor                              |
| SGN-U213644   | TC124207/124208 | transcription factor JERF1                             |
| SGN-U213429   | TC116186        | WRKY DNA-binding protein                               |
| SGN-U215122   | TC122662        | WRKY family transcription factor                       |
| SGN-U215123   | TC125516        | WRKY family transcription factor                       |
| SGN-U218504   | TC118316        | WRKY family transcription factor                       |
| SGN-U215688   | TC117853        | WRKY family transcription factor                       |
| SGN-U214107   | TC124512/131075 | WRKY family transcription factor                       |
| SGN-U213244   | TC124157        | WRKY transcription factor                              |
| SGN-U216251   | TC125410        | YABBY-like transcription factor                        |
| SGN-U223009   | TC128710        | ethylene responsive element binding factor 2 (EREBP-2) |
| SGN-U220756   | TC128476        | putative helicase-like transcription factor            |
| SGN-U222941   | TC130182        | putative myb-related DNA-binding protein               |
| SGN-U215004   | TC124766        | Floral homeotic protein AGAMOUS (TAG1)                 |
| SGN-U214883   | TC116955        | JERF3                                                  |
| SGN-U214154   | TC116559/116560 | expressed protein                                      |
| SGN-U215511   | TC116768        | Expressed protein                                      |
| SGN-U221167   | TC120210        | expressed protein                                      |
| SGN-U234728   |                 | expressed protein                                      |
| SGN-U234775   |                 | expressed protein                                      |
| SGN-U214634   | TC116610        | expressed protein                                      |
| SGN-U215076   | TC117374        | expressed protein                                      |
| SGN-U217715   | TC125842        | expressed protein                                      |
| SGN-U218349   | TC118233        | expressed protein                                      |
| SGN-U216875   | TC117838        | expressed protein                                      |
| SGN-U218828   | TC118402/118403 | Expressed protein                                      |
| SGN-U219364   | TC128759        | expressed protein                                      |
| SGN-U224538   | TC127975        | expressed protein                                      |
| SGN-U227068   | TC122318        | expressed protein                                      |
| SGN-U222357   | TC130539        | Expressed protein                                      |

| <b>SGN ID</b> | <b>TIGR ID</b>  | <b>Annotation</b>                                |
|---------------|-----------------|--------------------------------------------------|
| SGN-U226365   | TC121689        | Expressed protein                                |
| SGN-U216485   | TC122859/125958 | expressed protein                                |
| SGN-U213810   | TC124440        | expressed protein                                |
| SGN-U213693   | TC124313        | expressed protein                                |
| SGN-U226511   | TC122344        | expressed protein [Arabidopsis thaliana] SGS3    |
| SGN-U215756   | TC124922        | hypothetical protein                             |
| SGN-U219679   | TC127051        | hypothetical protein                             |
| SGN-U220306   | TC118208        | hypothetical protein                             |
| SGN-U216537   | TC116047        | hypothetical protein                             |
| SGN-U217849   | TC126893        | hypothetical protein                             |
| SGN-U214336   | TC116571/116572 | unknown                                          |
| SGN-U214730   | TC116684        | unknown                                          |
| SGN-U213837   | TC117234        | Unknown protein                                  |
| SGN-U216904   | TC125792        | unknown protein                                  |
| SGN-U220552   | TC119175        | unknown protein                                  |
| SGN-U223487   | TC122006        | unknown protein                                  |
| SGN-U227099   |                 | unknown protein                                  |
| SGN-U215593   | TC125030        | unknown protein                                  |
| SGN-U219371   | TC126694        | unknown protein                                  |
| SGN-U219503   | TC119604/122282 | unknown protein                                  |
| SGN-U233493   | TC122308        | unknown protein                                  |
| SGN-U214498   | TC117076        | unknown protein                                  |
| SGN-U221570   | TC128400        | ECR1 Ubiquitin activating enzyme E1 like protein |
| SGN-U214579   | TC116861        | Pto-responsive gene 1 protein                    |
| SGN-U212779   | TC124023/124026 | AAA-type ATPase family                           |
| SGN-U226307   | TC129714        | ABC transporter family                           |
| SGN-U215402   | TC125035        | alpha subunit of F-actin capping protein         |
| SGN-U218999   | TC119044        | calcium-binding EF-hand family protein           |
| SGN-U247494   | TC119996        | Calmodulin                                       |
| SGN-U215407   | TC117148        | chaperonin 21 precursor                          |
| SGN-U212651   | TC115953/115957 | 60S RIBOSOMAL PROTEIN L10                        |
| SGN-U232644   | TC117483        | 60S ribosomal protein L37                        |
| SGN-U225020   |                 | acetyl-CoA synthetase                            |
| SGN-U213329   | TC115867/115870 | adenine phosphoribosyltransferase 1, APRT        |
| SGN-U212944   | TC124201        | aldo/keto reductase family                       |

| <b>SGN ID</b> | <b>TIGR ID</b>                 | <b>Annotation</b>                                   |
|---------------|--------------------------------|-----------------------------------------------------|
| SGN-U225806   | TC131519                       | alpha-mannosidase, putative                         |
| SGN-U212885   | TC123957/123958                | chloroplast thiazole biosynthetic protein, putative |
| SGN-U218890   | TC118740                       | clathrin coat assembly like protein                 |
| SGN-U214024   | TC124426                       | dehydration-induced protein ERD15                   |
| SGN-U212894   | TC124476; 124477               | disulfide isomerase precursor, putative             |
| SGN-U212838   | TC123771; 123775; 123780; 1237 | Elongation factor 1-alpha                           |
| SGN-U212827   | TC123803                       | Glucan endo-1,3-beta-glucosidase B precursor        |
| SGN-U213190   | TC124101                       | glucosyltransferase                                 |
| SGN-U217313   | TC125669/125670                | glutathione S-conjugate ABC transporter             |
| SGN-U223655   | TC130531                       | lipase class 3 family protein                       |
| SGN-U213641   | TC125673                       | lipid transfer protein LTP1 precursor               |
| SGN-U215011   | TC116781                       | methylenetetrahydrofolate reductase -related        |
| SGN-U215409   | TC117045                       | NADH-cytochrome b5 reductase                        |
| SGN-U214426   | TC124503                       | NADPH:protochlorophyllide oxidoreductase            |
| SGN-U222641   | TC130040                       | P450 monooxygenase                                  |
| SGN-U224981   | TC128317                       | plastidic cysteine synthase 1                       |
| SGN-U215171   | TC116557                       | pyruvate dehydrogenase                              |
| SGN-U226206   | TC130830                       | SCARECROW gene regulator, putative                  |
| SGN-U228015   |                                | self-incompatibility protein S3 precursor           |
| SGN-U223774   | TC123115                       | serine carboxypeptidase, putative                   |
| SGN-U221642   | TC128983                       | short-chain dehydrogenase/reductase family protein  |
| SGN-U216281   |                                | short-chain dehydrogenase/reductase family protein  |
| SGN-U231528   | TC122303                       | SNF2 domain-containing protein                      |
| SGN-U213714   | TC123777                       | spermidine synthase -related                        |
| SGN-U215017   | TC123835                       | sterol 24-C-methyltransferase, putative             |
| SGN-U230582   |                                | thromboxane-A synthase, putative /cyto P450 family  |
| SGN-U218547   | TC128309                       | transducin / WD-40 repeat protein family            |
| SGN-U244010   | TC126162                       | VDAC2.1                                             |
| SGN-U214124   | TC117869                       | vesicle transport protein SEC22, putative           |
| SGN-U222752   | TC128115                       | wound-induced protein, putative                     |
| SGN-U215153   | TC125606                       | xyloglucan endotransglycosylase LeXET2              |
| SGN-U214357   | TC124660                       | not annotated                                       |
| SGN-U214905   | TC116857                       | not annotated                                       |
| SGN-U220498   | TC129657                       | not annotated                                       |
| SGN-U227487   |                                | not annotated                                       |

| <b>SGN ID</b> | <b>TIGR ID</b>                | <b>Annotation</b>                                   |
|---------------|-------------------------------|-----------------------------------------------------|
| SGN-U245860   | TC113304                      | not annotated                                       |
| SGN-U215350   | TC125341                      | clathrin adaptor medium chain protein MU1B -related |
| SGN-U227329   | TC129711                      | DNA nick sensor -related                            |
| SGN-U213616   | TC116203; 116204              | dormancy-associated protein -related                |
| SGN-U220468   | TC128307                      | Protein farnesyltransferase alpha subuni            |
| SGN-U225351   | TC120352                      | putative chloroplast nucleoid DNA binding protein   |
| SGN-U212555   | TC116160                      | ribosomal protein L11-like                          |
| SGN-U268205   | TC125984                      | S-adenosyl-L-homocysteinase -related                |
| SGN-U215861   | TC117244                      | AAA-type ATPase family                              |
| SGN-U212648   | TC115769/115782/124722        | alpha-tubulin                                       |
| SGN-U217341   | TC124626                      | cytochrome b5                                       |
| SGN-U233728   | TC119161                      | dihydroflavonol 4-reductase family                  |
| SGN-U214114   | TC117227                      | epoxide hydrolase                                   |
| SGN-U227713   |                               | flavin-containing monooxygenase (FMO) family        |
| SGN-U220010   | TC127270                      | GAL83 protein                                       |
| SGN-U225773   | TC120567                      | membrane located receptor-like protein              |
| SGN-U227174   | TC131629                      | pectinesterase family                               |
| SGN-U219990   | TC128979                      | putative HSP70                                      |
| SGN-U213318   | TC116053                      | transcription factor BTF3-related                   |
| SGN-U229262   |                               | UMUC-like DNA repair family protein                 |
| SGN-U215106   | TC125008                      | F-box protein family                                |
| SGN-U212676   | TC123805                      | polyubiquitin                                       |
| SGN-U216384   | TC119137                      | protease-related                                    |
| SGN-U228406   | TC119715                      | putative nucellin-like aspartic protease            |
| SGN-U218253   | TC120170                      | calcineurin-like phosphoesterase family             |
| SGN-U218823   | TC130888                      | aldehyde dehydrogenase                              |
| SGN-U213653   | TC124331                      | aldehyde dehydrogenase 1 precursor                  |
| SGN-U220004   | TC126840                      | DnaJ domain-containing protein                      |
| SGN-U229703   | TC117852                      | EIL2 [ <i>Lycopersicon esculentum</i> ]             |
| SGN-U226325   | TC128894                      | EIN3-like protein                                   |
| SGN-U225539   | TC116564/123709/123733/123748 | glucose-1-phosphate adenylyltransferase small chain |
| SGN-U217524   | TC119394/128000               | glycosyl hydrolase family                           |
| SGN-U215960   | TC126549                      | MATE efflux protein - related                       |
| SGN-U230103   |                               | N-acetylglucosaminyltransferase family              |
| SGN-U213372   | TC124141                      | oxidoreductase, 2OG-Fe(II) oxygenase family protein |

| <b>SGN ID</b> | <b>TIGR ID</b>  | <b>Annotation</b>                                          |
|---------------|-----------------|------------------------------------------------------------|
| SGN-U225036   | TC127359        | pectinesterase - related                                   |
| SGN-U205878   | CK640721        | photosystem II protein psbK precursor                      |
| SGN-U212702   | TC123875        | plastidic aldolase NPALDP1 [Nicotiana paniculata]          |
| SGN-U212748   | TC124031/124033 | Probable glutathione S-transferase                         |
| SGN-U216898   | TC118371        | putative 9-cis-epoxycarotenoid dioxygenase                 |
| SGN-U228466   |                 | putative pentatricopeptide (PPR) repeat-containing protein |
| SGN-U218863   | TC128352        | putative thaumatin-like protein                            |
| SGN-U217236   | TC125572        | replication protein, putative                              |
| SGN-U218065   | TC126964        | thylakoid lumenal 16.5 kDa protein, chloroplast precursor  |
| SGN-U213317   | TC116051        | transcription factor BTF3-related                          |
| SGN-U214637   | TC125656/125657 | Vacuolar ATP synthase                                      |
| SGN-U224525   |                 | not annotated                                              |
| SGN-U216730   | TC125570        | not annotated                                              |
| SGN-U220888   | TC120073        | Expressed protein                                          |
| SGN-U233493   | TC122308        | Expressed protein                                          |
| SGN-U216993   | TC118300/130314 | unknown protein                                            |
| SGN-U227186   |                 | Unknown protein                                            |
| SGN-U212765   | TC123883/123885 | Alcohol dehydrogenase                                      |
| SGN-U221394   | TC127962        | metal-nicotianamine transporter                            |
| SGN-U220416   | TC127512        | TPR-containing protein                                     |
| SGN-U223560   | TC122540        | not annotated                                              |
| SGN-U315653   | TC116955        | AP2 domain-containing protein                              |
| SGN-U313507   | TC124201        | aldo/keto reductase family protein                         |
| SGN-U315434   | TC117873        | serine carboxypeptidase S10 family                         |
| SGN-U338898   |                 | NADH-cytochrome b5 reductase                               |
| SGN-U318876   | TC117426        | DNA-binding family protein                                 |
| SGN-U321995   |                 | clathrin adaptor complexes                                 |
| SGN-U315857   | TC116861        | Pto-responsive gene 1 protein                              |
| SGN-U325281   | TC128630        | squamosa promoter-binding protein-like 6                   |
| SGN-U326222   | TC120735        | putative ABC transporter                                   |
| SGN-U327816   |                 | not annotated                                              |
| SGN-U313367   | TC124440        | iron-deficiency-responsive protein, putative               |
| SGN-U328237   |                 | putative serine carboxypeptidase                           |
| SGN-U316612   | TC119393        | protease-related                                           |
| SGN-U312660   | TC123958        | putative chloroplast thiazole biosynthetic protein         |

| <b>SGN ID</b> | <b>TIGR ID</b> | <b>Annotation</b>                                         |
|---------------|----------------|-----------------------------------------------------------|
| SGN-U323440   | TC128983       | short-chain dehydrogenase/reductase                       |
| SGN-U316320   | TC116857       | not annotated                                             |
| SGN-U315857   | TC116861       | Pto-responsive gene 1                                     |
| SGN-U314192   | TC124503       | protochlorophyllide reductase                             |
| SGN-U315547   | TC124661       | not annotated                                             |
| SGN-U316320   | TC116857       | not annotated                                             |
| SGN-U312675   | TC124476       | protein disulfide isomerase-like (PDIL) protein           |
| SGN-U320370   | TC128309       | WD-40 repeat family protein                               |
| SGN-U313041   | TC117483       | 60S ribosomal protein L37                                 |
| SGN-U322305   | TC119295       | GATA transcription factor                                 |
| SGN-U318913   | TC125669       | glutathione S-conjugate ABC transporter                   |
| SGN-U315344   | TC117148       | chaperonin, chloroplast                                   |
| SGN-U324705   |                | not annotated                                             |
| SGN-U319701   | TC128400       | ubiquitin activating enzyme, putative                     |
| SGN-U321958   | TC120210       | expressed protein                                         |
| SGN-U320847   | TC128115       | wound-responsive protein, putative                        |
| SGN-U315256   | TC125606       | xyloglucan:xyloglucosyl transferase                       |
| SGN-U318366   | TC118299       | ethylene-responsive transcriptional coactivator, putative |
| SGN-U318919   | TC118590       | MADS-box protein (AGL11)                                  |
| SGN-U313675   | TC125673       | nonspecific lipid transfer protein                        |
| SGN-U328442   |                | S3 self-incompatibility protein                           |
| SGN-U313507   | TC124201       | aldo/keto reductase family protein                        |
| SGN-U312947   | TC124101       | UDP-glucuronosyl/UDP-glucosyl transferase family          |
| SGN-U317701   | TC127517       | acyl-activating enzyme                                    |
| SGN-U316682   | TC117238       | floral homeotic protein APETALA3                          |
| SGN-U333186   |                | kinase family protein                                     |
| SGN-U312374   | TC115953       | 60S ribosomal protein L10                                 |
| SGN-U314314   | TC117076       | expressed protein                                         |
| SGN-U317074   | TC119044       | calcium-binding EF hand family                            |
| SGN-U322842   | TC119175       | Putative phosphatase 2A inhibitor                         |
| SGN-U318429   | TC125792       | expressed protein                                         |
| SGN-U328442   |                | S3 self-incompatibility protein                           |
| SGN-U320310   | TC118208       | methyltransferase-related                                 |
| SGN-U323071   | TC130531       | lipase class 3 family                                     |
| SGN-U317701   | TC127517       | similar to acyl-activating enzyme                         |



| <b>SGN ID</b> | <b>TIGR ID</b>                | <b>Annotation</b>                                |
|---------------|-------------------------------|--------------------------------------------------|
| SGN-U315729   |                               | not annotated                                    |
| SGN-U315087   | TC117869                      | vesicle transport protein SEC22, putative        |
| SGN-U313507   | TC124201                      | aldo/keto reductase family                       |
| SGN-U312944   | TC123803                      | glycosyl hydrolase family                        |
| SGN-U314886   | TC123779                      | spermidine synthase 1                            |
| SGN-U320310   | TC118208                      | methyltransferase-related                        |
| SGN-U333346   |                               | similarity to thromboxane-A synthase             |
| SGN-U313941   | TC123835                      | S-adenosyl-methionine-sterol-C-methyltransferase |
| SGN-U315029   | TC116560                      | Drm3-like protein                                |
| SGN-U318153   |                               | short-chain dehydrogenase/reductase              |
| SGN-U314915   | TC116044/116045               | Adenosylhomocysteinase                           |
| SGN-U321060   | TC128307                      | Protein farnesyltransferase alpha subunit        |
| SGN-U322124   | TC128476                      | helicase-like transcription factor               |
| SGN-U319263   | TC119161                      | dihydroflavonol 4-reductase                      |
| SGN-U344705   |                               | pectinesterase family                            |
| SGN-U344705   |                               | pectinesterase family                            |
| SGN-U313521   | TC116186                      | sweet potato SPF1 protein                        |
| SGN-U317390   | TC124626                      | cytochrome b5 - common tobacco                   |
| SGN-U313082   | TC124722/115782               | alpha-tubulin                                    |
| SGN-U329724   |                               | N-acetylglucosaminyltransferase                  |
| SGN-U31867    | TC115877                      | phloem transcription factor M1                   |
| SGN-U319244   | TC119394/128000               | alpha-glucosidase                                |
| SGN-U318109   | TC127270                      | GAL83 protein                                    |
| SGN-U314706   | TC123748/123753/116564/123733 | RuBisCO small subunit 3A/3C                      |
| SGN-U314706   | TC123748/123753/116564/123733 | RuBisCO small subunit 3A/3C                      |
| SGN-U315008   | TC125828                      | cyclin-dependent protein kinase p34cdc2          |
| SGN-U314543   |                               | protein phosphatase type 2C                      |
| SGN-U326515   | TC127359                      | pectinesterase - related                         |
| SGN-U326515   | TC127359                      | pectinesterase - related                         |
| SGN-U318109   | TC127270                      | GAL83 protein                                    |
| SGN-U327452   |                               | HSP70                                            |
| SGN-U317140   | TC126549/130883               | MATE efflux protein - related                    |
| SGN-U318460   | TC122424                      | cdk-activating kinase 1                          |
| SGN-U318109   | TC127270                      | GAL83 protein                                    |
| SGN-U313800   | TC124331                      | aldehyde dehydrogenase                           |

| <b>SGN ID</b> | <b>TIGR ID</b>                | <b>Annotation</b>                                       |
|---------------|-------------------------------|---------------------------------------------------------|
| SGN-U313860   | TC125656/125657               | V-type ATPase                                           |
| SGN-U319616   | TC119223                      | Bgamma - like protein                                   |
| SGN-U313084   | TC124033/124031               | Probable glutathione S-transferase                      |
| SGN-U329173   |                               | photosystem II protein                                  |
| SGN-U320503   | TC126964                      | chloroplast thylakoid lumen protein                     |
| SGN-U313450   | TC124431                      | geranylgeranyl reductase                                |
| SGN-U313263   | TC124140/124141               | oxygenase family                                        |
| SGN-U313084   | TC124033/124031               | glutathione S-transferase                               |
| SGN-U313051   | TC116167                      | hin1-like protein                                       |
| SGN-U313145   | TC123805                      | polyubiquitin                                           |
| SGN-U317465   | TC125359/125360116540         | MADS-box protein 1                                      |
| SGN-U317465   | TC125359/125360116540         | MADS-box protein 1                                      |
| SGN-U314706   | TC123748/123753/116564/123733 | Ribulose bisphosphate carboxylase small chain 3A/3C     |
| SGN-U313495   | TC126748                      | plastocyanin-like domain containing protein             |
| SGN-U319270   | TC125572                      | replication protein, putative                           |
| SGN-U339624   |                               | DnaJ domain-containing protein                          |
| SGN-U312608   | TC123875                      | plastidic aldolase NPALDP1                              |
| SGN-U315008   | TC125828                      | cyclin-dependent protein kinase p34cdc2                 |
| SGN-U313800   | TC124331                      | aldehyde dehydrogenase 1 precursor [Lotus corniculatus] |
| SGN-U317289   | TC128352                      | thaumatin-like protein                                  |
