# Supplementary material
Source: PubMed Central journal article supplement (PMC2151726)
Supplement: plntphys_pp.107.107391_2.pdf [file plntphys_pp.107.107391_2.pdf]

### **Supplemental Figure 1.**

Alignment of amino acids of *N. benthamiana* *MADS4*, and their *N. tabacum*, and *S. lycopersicum* homologs. Asterisks indicate identical residues, dots indicate conserved residues. The MADS domain extends from amino acid 1 to 60 and K-box from amino acid 75-174.

### **Supplemental Figure 2**

Alignment of cDNAs of *NbMADS4-1* and *NbMADS4-2*. The asterisks indicate identical nucleotides.

### **Supplemental Figure 3**

Nucleotide sequence comparison of fragment 1 of *NbMADS4-1* (*NbMADS4-1F1*) and fragment 1 from *NbMADS4-2* (*NbMADS4-2F1*) used for silencing.

### **Supplemental Figure 4**

Nucleotide sequence comparison of fragment 2 of *NbMADS4-1* (*NbMADS4-1F2*) and fragment 2 from *NbMADS4-2* (*NbMADS4-2F2*) used for silencing.
